# Supplementary material for: Solid-state single-crystal-to-single-crystal transformation from a 2D layer to a 3D framework mediated by lattice iodine release
Source: Royal Society of Chemistry journal article supplement (doi:10.1039/c2cc33831a), 2012-01-01
Supplement: c2cc33831a.pdf [file c2cc33831a.pdf]

Supplementary Material (ESI) for Chemical Communications

**Solid-state single-crystal-to-single-crystal transformation from a 2D layer to a 3D framework mediated by lattice iodine release**

Yuan-Chun He,<sup>a</sup> Jin Yang,<sup>\*a</sup> Guo-Cheng Yang,<sup>b</sup> Wei-Qiu Kan<sup>a</sup> and Jian-Fang Ma<sup>\*a</sup>

<sup>a</sup> *Key Lab of Polyoxometalate Science, Department of Chemistry, Northeast Normal University, Changchun 130024, People's Republic of China*

<sup>b</sup> *School of Chemistry and Life Science, Changchun University of Technology, Changchun 130012, People's Republic of China*

\* Correspondence authors

E-mail: yangjinnenu@yahoo.com.cn (J. Yang)

E-mail: jianfangma@yahoo.com.cn (J.-F. Ma)

Fax: +86-431-85098620 (J.-F. Ma)

## Materials and methods

All chemicals and solvents used in the syntheses were of analytical grade and used without further purification. The C, H and N elemental analysis were conducted on a Perkin–Elmer 2400CHN elemental analyzer. IR-spectra were measured on a Mattson Alpha-Centauri spectrometer at the range of 4000–400  $\text{cm}^{-1}$ . X-ray powder diffractions were carried out on a Rigaku Dmax 2000 X-ray diffractometer with graphite monochromatized Cu  $K_{\alpha}$  radiation ( $\lambda = 0.154 \text{ nm}$ ) and  $2\theta$  ranging from 5 to 50°. All UV/vis spectra were recorded on a Cary 500 UV–VIS–NIR spectrophotometer from 200 nm to 600 nm using the same solvent in the examined solution as a blank.

## Impedance test

The pellet of sample **1** with 1.57 cm in diameter and 0.19 cm in thickness was prepared by first grinding the samples into a homogeneous powder with a mortar and pestle. The powders were then added to a die, sandwiched between two stainless steel electrodes and pressed.

The electrochemical impedance spectroscopy (EIS) was performed with an advanced electrochemical system (PARSTAT 2273, Ametek, USA) at room temperature. An ac voltage of 50 mV in amplitude with a frequency range from 50 Hz to 600 kHz was superimposed on the dc potential and applied to the material. The experimental data of the electrochemical impedance plot were analyzed by applying the nonlinear least squares fitting to the theoretical model represented by a Randles equivalent electrical circuit attached by PARSTAT 2273.

The constant phase element (CPE) was introduced to account for the non-ideality of the interface between the electrode and electrolyte in the practical impedance spectrum. Every conductivity can be calculated by following equation.

$$\sigma = \frac{l}{R_s S}$$

where  $l$  and  $S$  are the thickness (cm) and cross-sectional area (cm<sup>2</sup>) of the pellet respectively, and  $R_s$ , which was extracted directly from the impedance plots, is the bulk resistance of the sample ( $\Omega$ ).

### **X-ray crystallography**

Single-crystal X-ray diffraction data for **1** and **2** were recorded at a temperature of 293 (2) K on a Oxford Diffraction Gemini R Ultra diffractometer, using a  $\omega$  scan technique with Mo-K $\alpha$  radiation ( $\lambda = 0.71073$  Å). The structure was solved by Direct Method of SHELXS-97<sup>1</sup> and refined by full-matrix least-squares techniques using the SHELXL-97 program.<sup>2</sup> Non-hydrogen atoms were refined with anisotropic temperature parameters, and hydrogen atoms of the ligands were refined as rigid groups.

### **References**

- 1 G. M. Sheldrick, SHELXS-97, *Programs for X-ray Crystal Structure Solution*; University of Göttingen: Göttingen, Germany, 1997.
- 2 G. M. Sheldrick, SHELXL-97, *Programs for X-ray Crystal Structure Refinement*; University of Göttingen: Göttingen, Germany, 1997.

**Table S1.** Crystal data and structure refinements for compounds **1** and **2**.

|                                                    | <b>1</b>                                                         | <b>2</b>                                                                      |
|----------------------------------------------------|------------------------------------------------------------------|-------------------------------------------------------------------------------|
| Formula                                            | C <sub>6</sub> H <sub>4</sub> Cu <sub>0.5</sub> INO <sub>2</sub> | C <sub>24</sub> H <sub>16</sub> Cu <sub>2</sub> N <sub>4</sub> O <sub>8</sub> |
| Fw                                                 | 280.77                                                           | 615.49                                                                        |
| Crystal system                                     | Monoclinic                                                       | Monoclinic                                                                    |
| Space group                                        | <i>P2<sub>1</sub>/n</i>                                          | <i>Cc</i>                                                                     |
| <i>a</i> / Å                                       | 5.8382(3)                                                        | 4.9737(17)                                                                    |
| <i>b</i> / Å                                       | 12.5979(6)                                                       | 25.022(3)                                                                     |
| <i>c</i> / Å                                       | 10.8127(5)                                                       | 11.0111(16)                                                                   |
| $\alpha$ / °                                       | 90                                                               | 90                                                                            |
| $\beta$ / °                                        | 91.121(4)                                                        | 98.48(2)                                                                      |
| $\gamma$ / °                                       | 90                                                               | 90                                                                            |
| <i>V</i> / Å <sup>3</sup>                          | 795.11(7)                                                        | 1355.4(5)                                                                     |
| <i>Z</i>                                           | 4                                                                | 2                                                                             |
| <i>D<sub>c</sub></i> / g cm <sup>-3</sup>          | 2.345                                                            | 1.508                                                                         |
| <i>F</i> (000)                                     | 522                                                              | 620                                                                           |
| <i>R</i> (int)                                     | 0.0282                                                           | 0.0467                                                                        |
| GOF on <i>F</i> <sup>2</sup>                       | 1.055                                                            | 1.022                                                                         |
| <i>R</i> <sub>1</sub> [ <i>I</i> > 2σ( <i>I</i> )] | 0.0408                                                           | 0.0746                                                                        |
| <i>wR</i> <sub>2</sub> (all data)                  | 0.0943                                                           | 0.1927                                                                        |

$${}^a R_1 = \frac{\sum ||F_o| - |F_c||}{\sum |F_o|}, \quad {}^b wR_2 = \frac{|\sum w(|F_o|^2 - |F_c|^2)|}{\sum w(F_o)^2}.$$

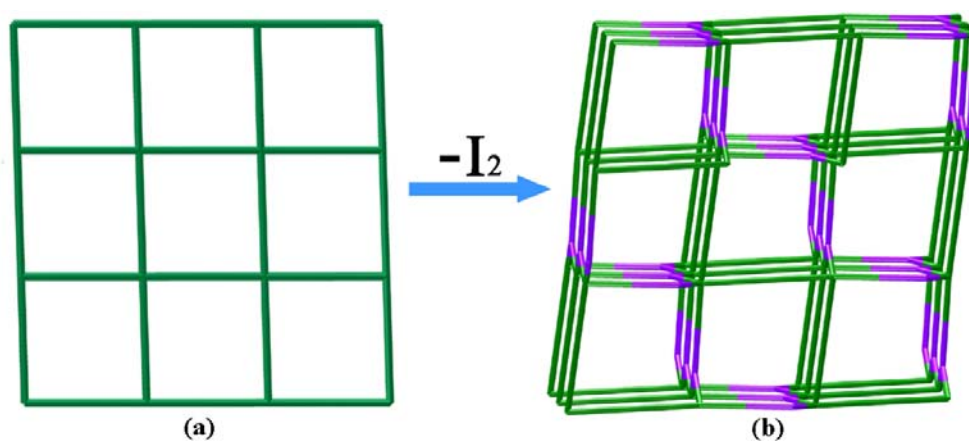

**Fig. S1.** (a) Schematic representation of the 2D (4,4) network of **1** and (b) view of the 3D (3,5)-connected net of **2**.

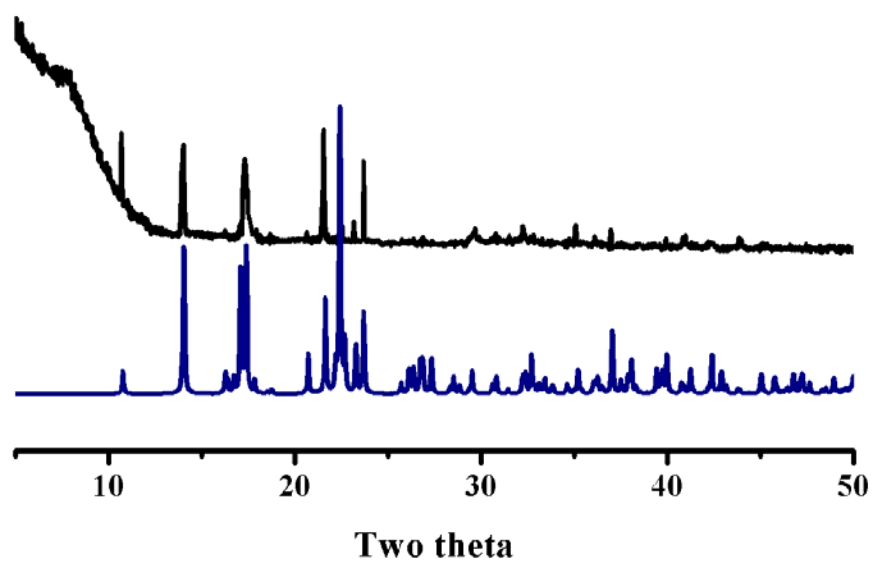

(a)

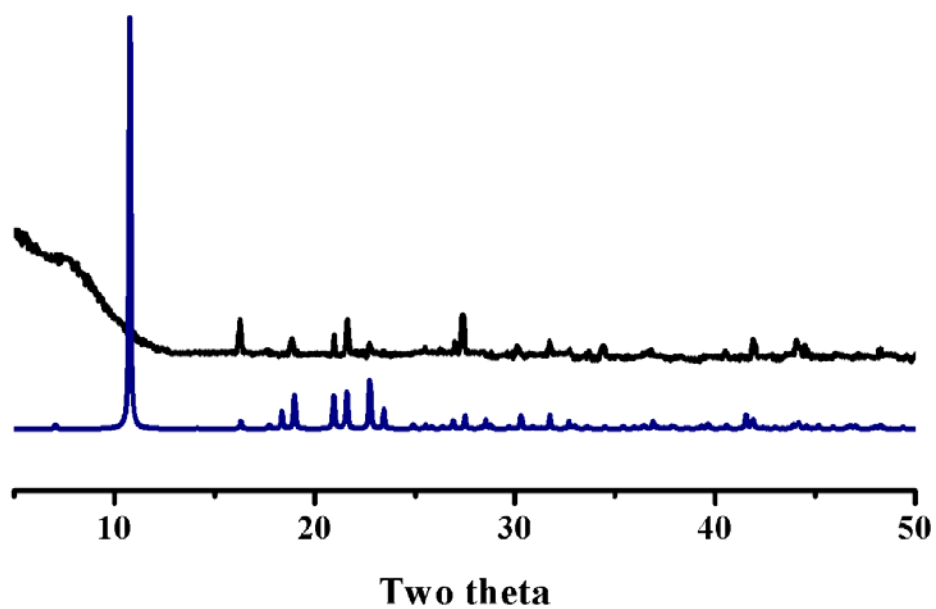

(b)

**Fig. S2.** The simulated (blue) and experimental (black) PXRD patterns for compounds **1** (a) and **2** (b).

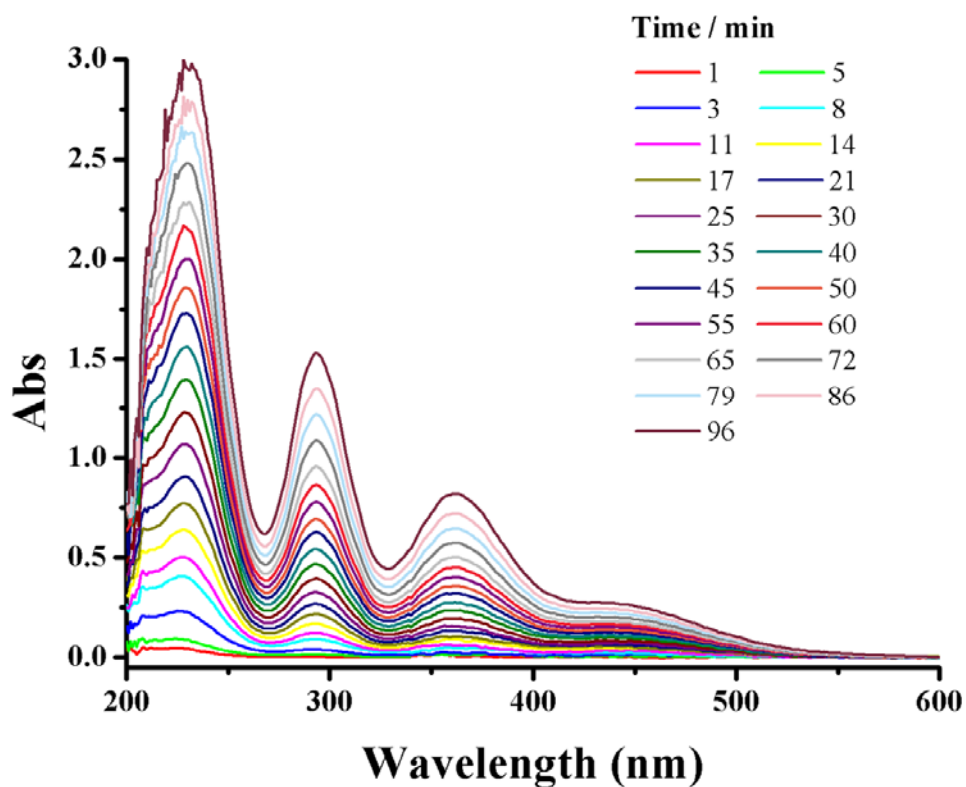

(a)

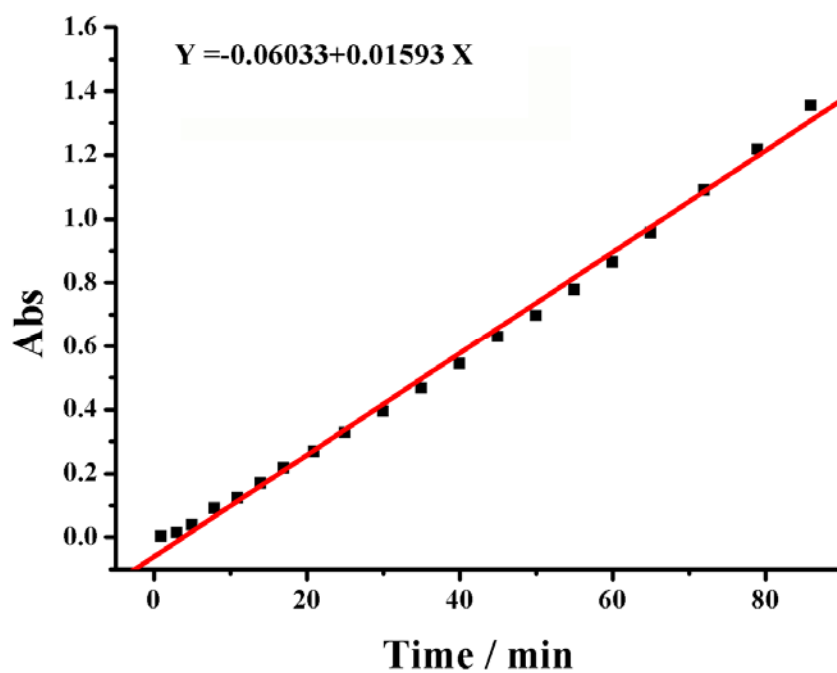

(b)

**Fig. S3.** (a) Temporal evolution of UV/vis absorption spectra for the  $I_2$  delivery from three single crystals of **1** in 3 mL of MeOH and (b) the controlled delivery of  $I_2$  ( $[I_2] = Kt$ ) in the first 96 min.

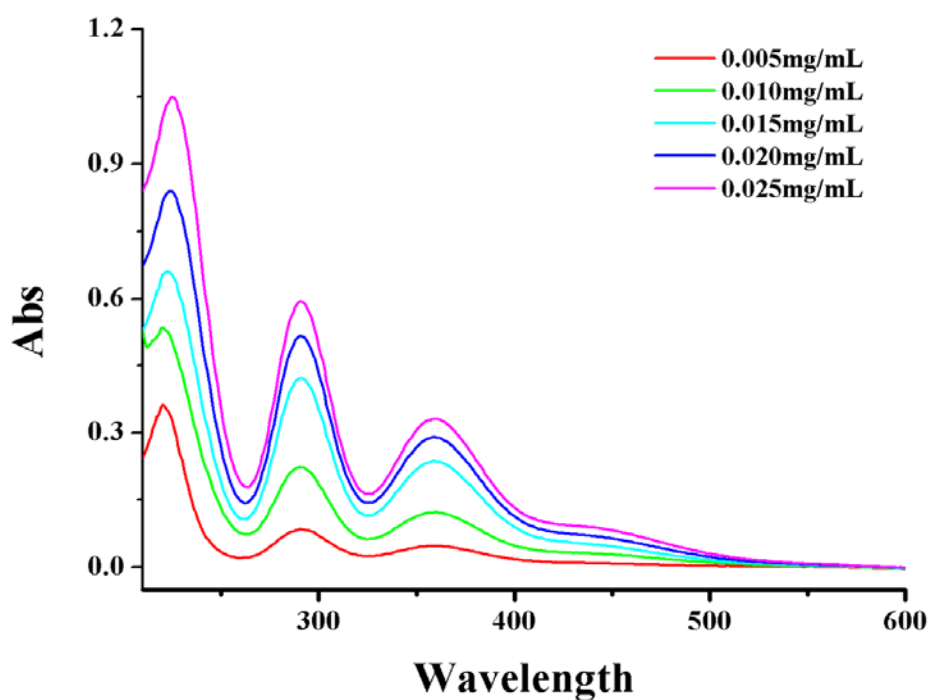

(a)

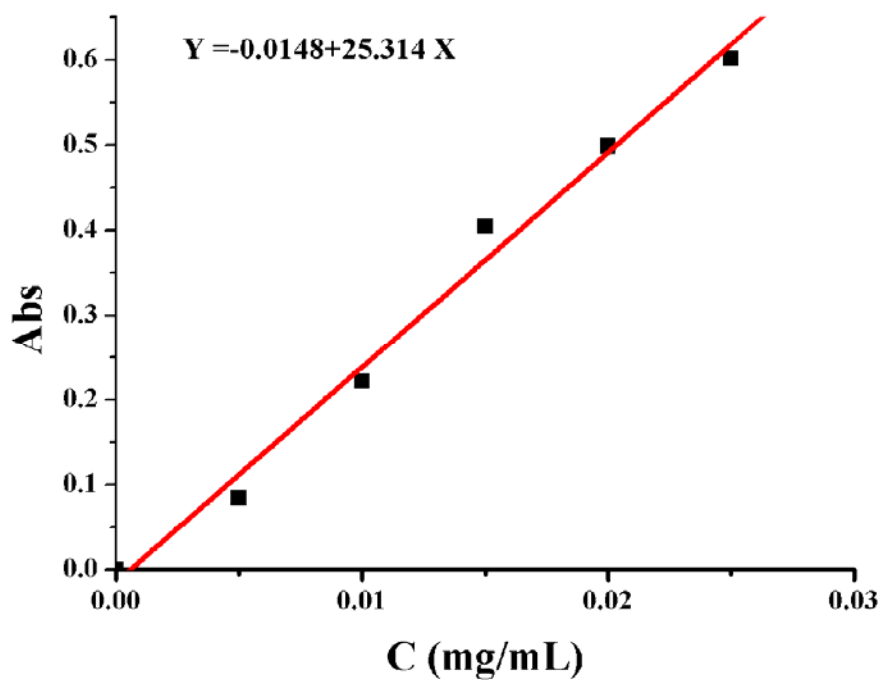

(b)

**Fig. S4.** (a) Calibration plot of standard iodine by UV/vis spectra in methanol solution and (b) the fitting of Abs value vs concentration of  $I_2$ , the relatively good linearity satisfies Lambert-Beer Law.

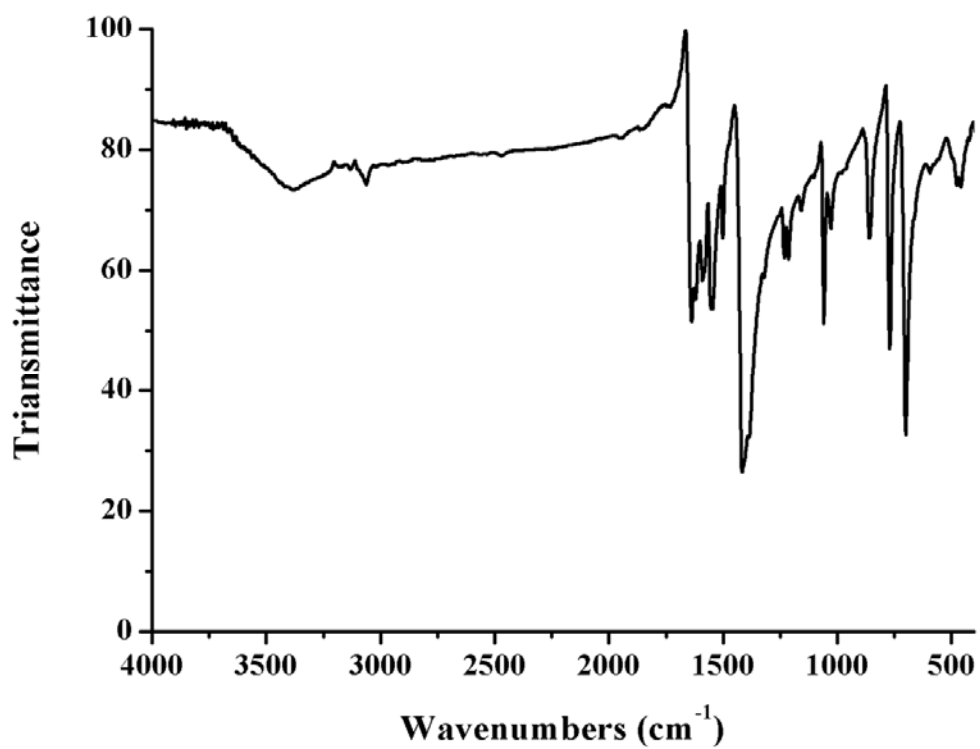

(a)

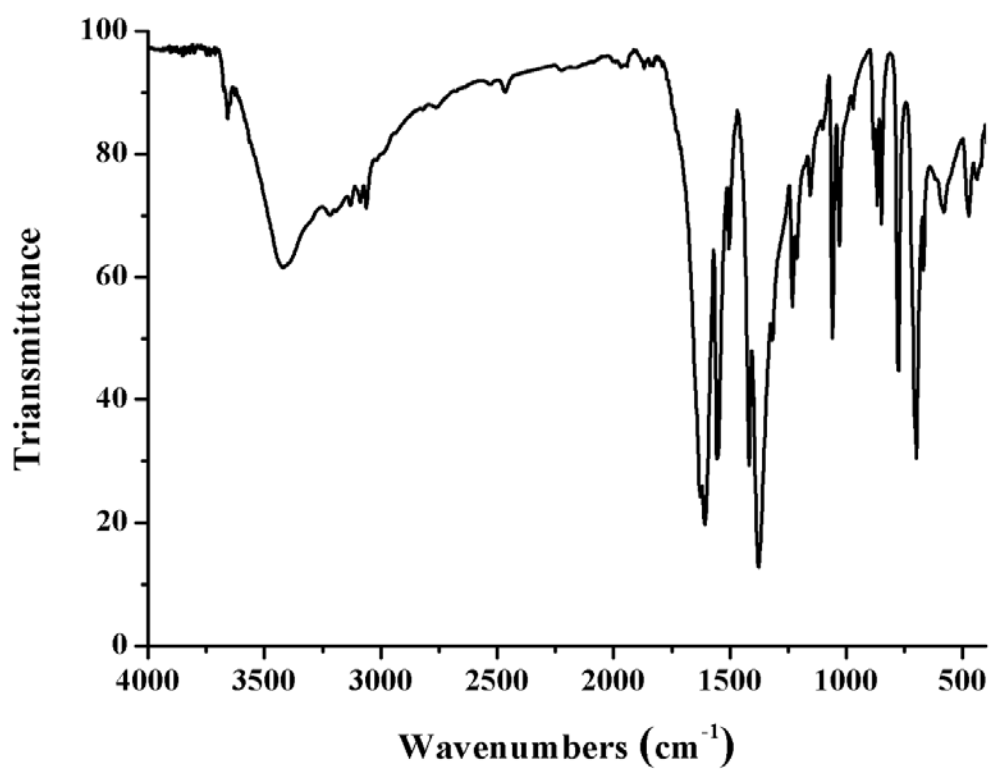

(b)

Fig. S5. IR spectra of compounds 1 and 2.
